# Supplementary material for: Activated CD4+ T cells-derived exosomal miR-142-3p boosts post-ischemic ventricular remodeling by activating myofibroblast
Source: publisher site journal article supplement (doi:10.18632/aging.103084), 2020-04-23
Supplement: Supplementary file [file aging-v12i8-103084-supplementary-material-SD1.pdf]

## SUPPLEMENTARY FIGURES

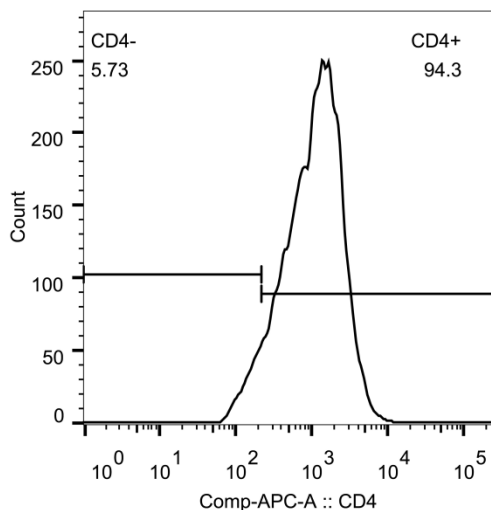

**Supplementary Figure 1. The purity of CD4<sup>+</sup> T cells.** CD4<sup>+</sup> T cells in spleen were purified using a mouse naïve CD4<sup>+</sup> T cell isolation kit, and the purity of the naïve CD4<sup>+</sup> T was validated by flow cytometry. The image shown is representative of three independent experiments.

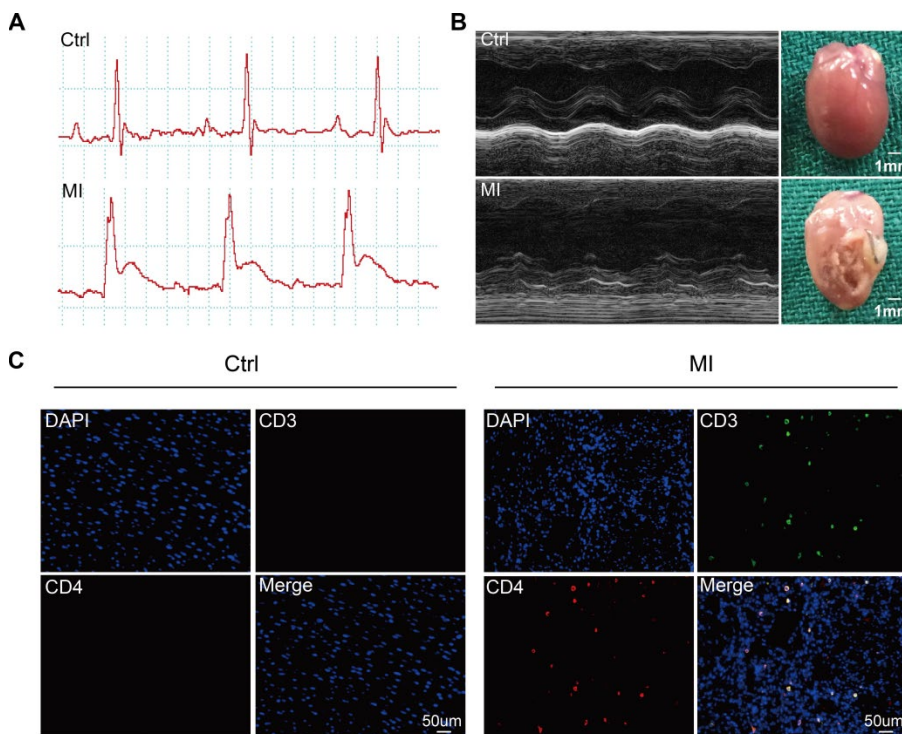

**Supplementary Figure 2. CD4<sup>+</sup> T cells infiltrated in the heart of myocardial infarction.** (A) Electrocardiograms showing significant ST-segment elevation by MI. The images shown are representative of three independent experiments. The electrocardiograms shown are representative of three independent experiments. (B) Representative echocardiograms and picture of sham-operated and MI mice at four weeks after surgery. n=5 per group. (C) Immunofluorescent labeling of CD4<sup>+</sup> cells in mice heart at the 4<sup>th</sup> week post-MI. The images shown are representative of three independent experiments. Ctrl: control. MI: myocardial infarction. Scale bar = 50 µm.

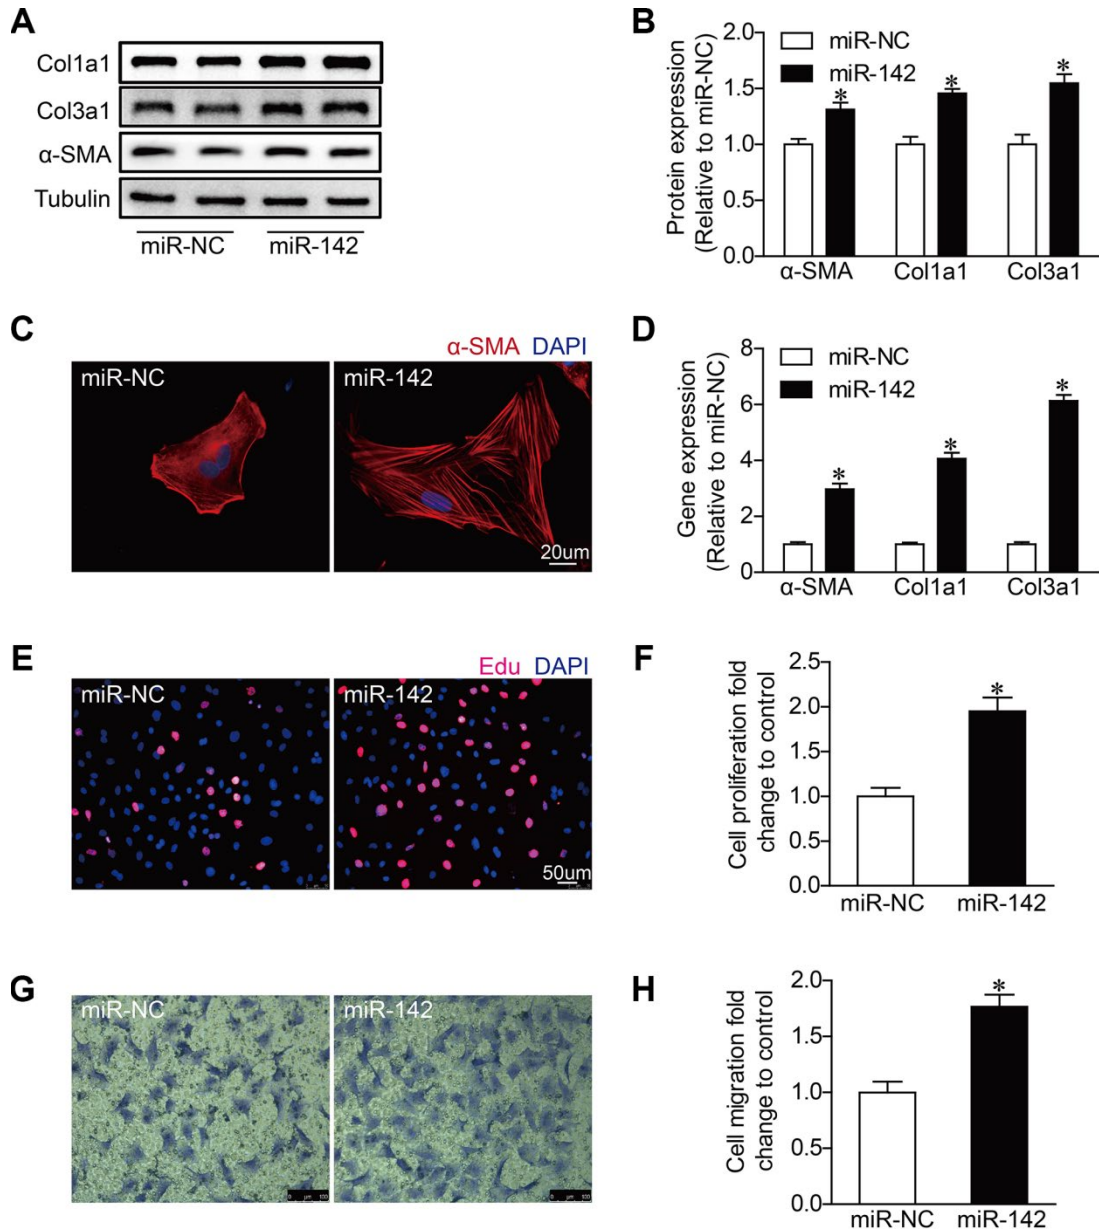

**Supplementary Figure 3. MiR-142-3p promoted cardiac fibroblasts differentiation, proliferation and migration.** (A) Western blotting analysis of  $\alpha$ -SMA, Col1a1 and Col3a1 levels in cardiac fibroblasts after transfected with miR-142-3p mimics or miR-NC for 48h. The blots shown are representative of three independent experiments. (B) Quantitative analysis of proteins expression. n=3 per group. \*P < .05. (C) Immunofluorescent analysis of myofibroblast activation. The images shown are representative of three independent experiments. Scale bar = 20  $\mu$ m. (D) qRT-PCR detection of  $\alpha$ -SMA, Col1a1 and Col3a1 in cardiac fibroblasts after transfected with miR142-3p mimics for 48h. n=3 per group. \*P < .05. (E) EdU incorporation detection of cardiac fibroblast proliferation. The images shown are representative of three independent experiments. Scale bar = 50  $\mu$ m. (F) Quantification analysis of cell proliferation using EdU assay data. \*P < .05. (G) Transwell assay of cardiac fibroblast migration. The images shown are representative of three independent experiments. Scale bar = 100  $\mu$ m. (H) Quantification analysis of cell migration using transwell assay data. \*P < .05.
